# Supplementary material
Source: PubMed Central journal article supplement (PMC4342188)

Figure S1

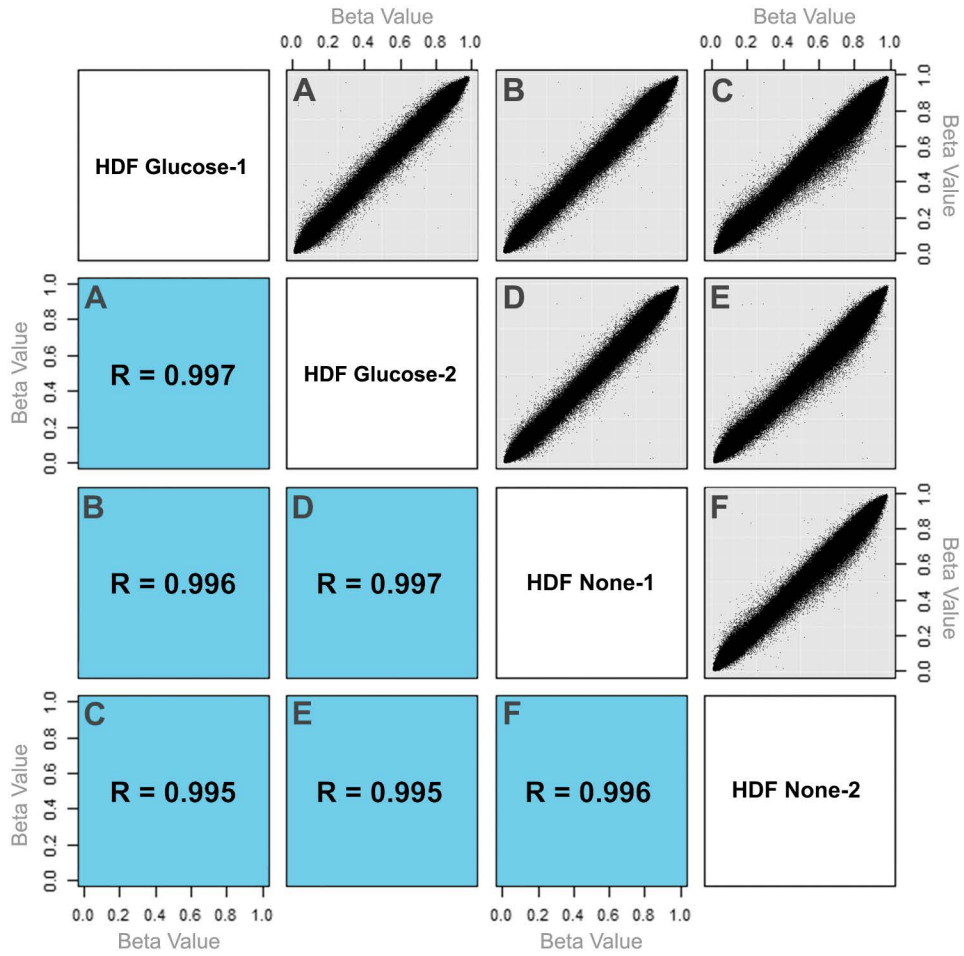

Figure S2

A

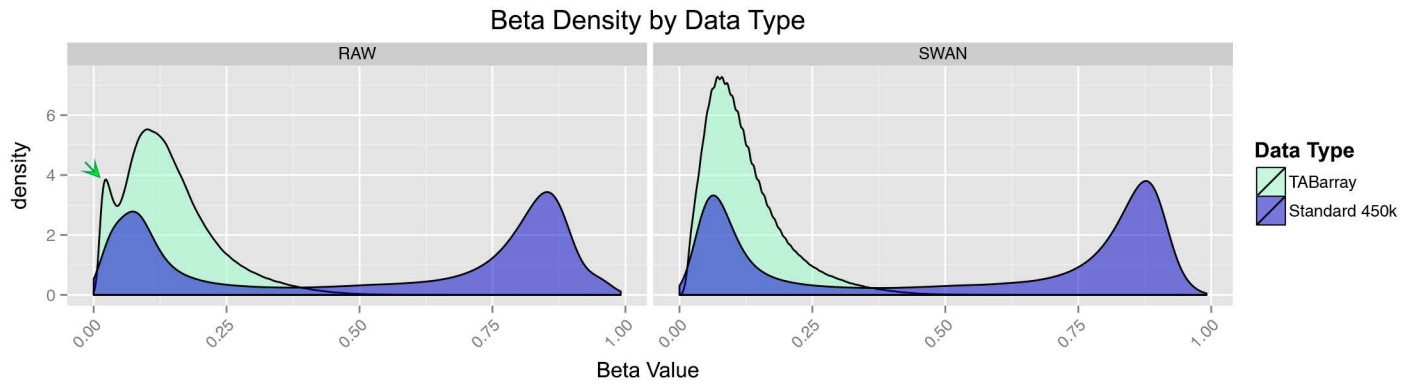

B

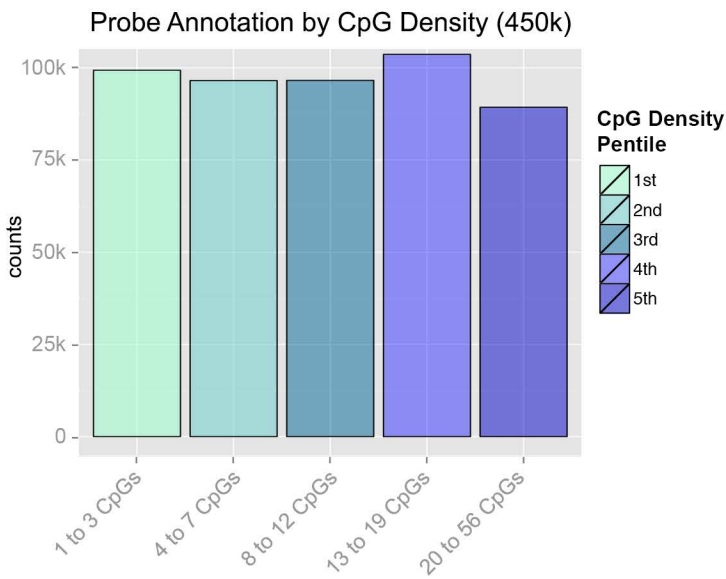

C

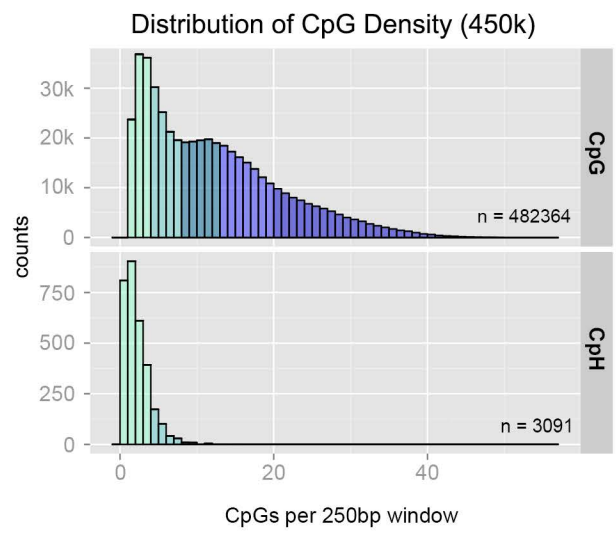

D

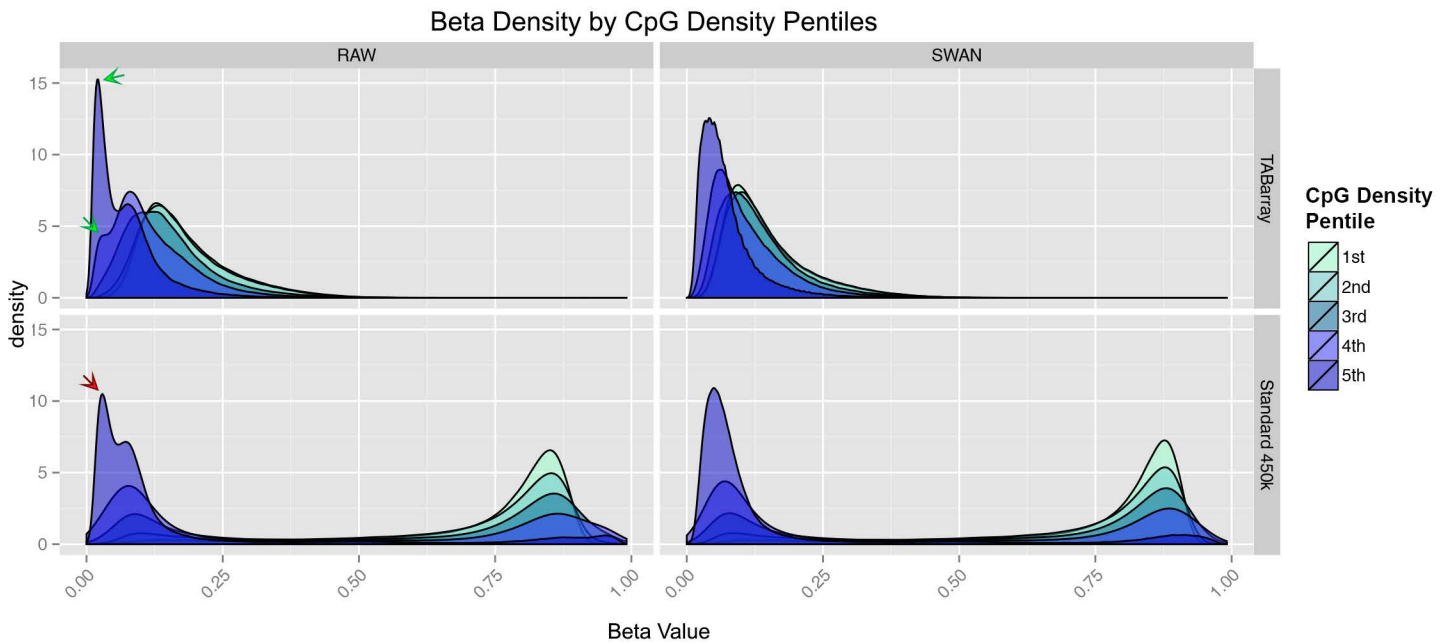

**Figure S3****A**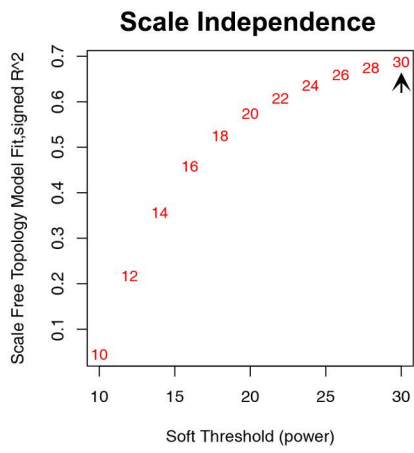**B**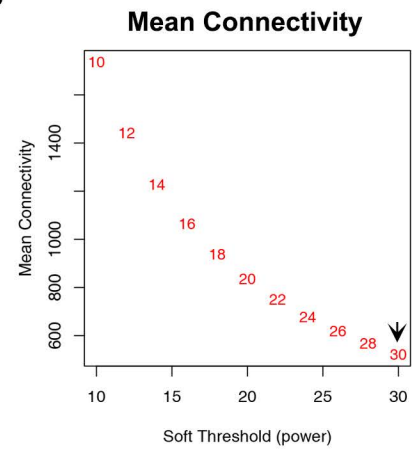**C**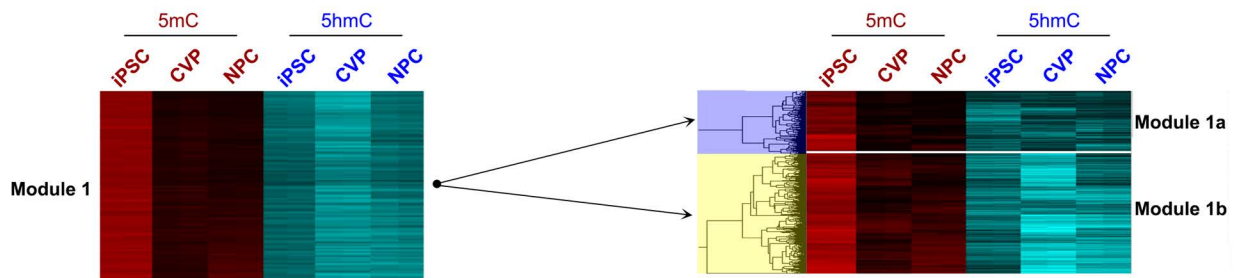**D**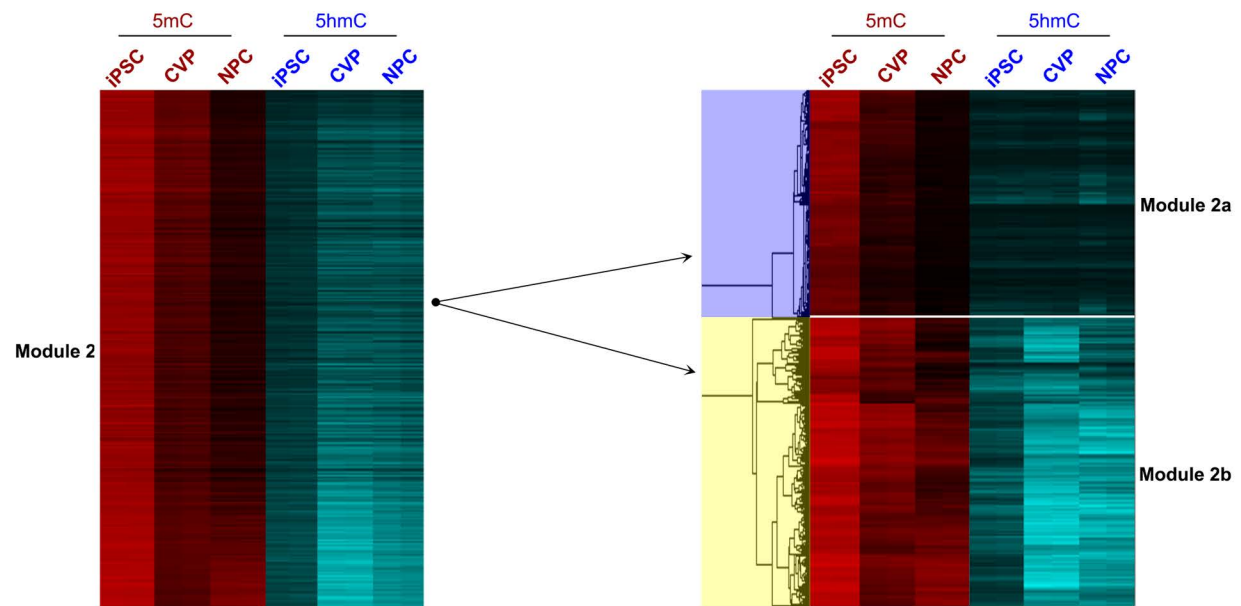**E**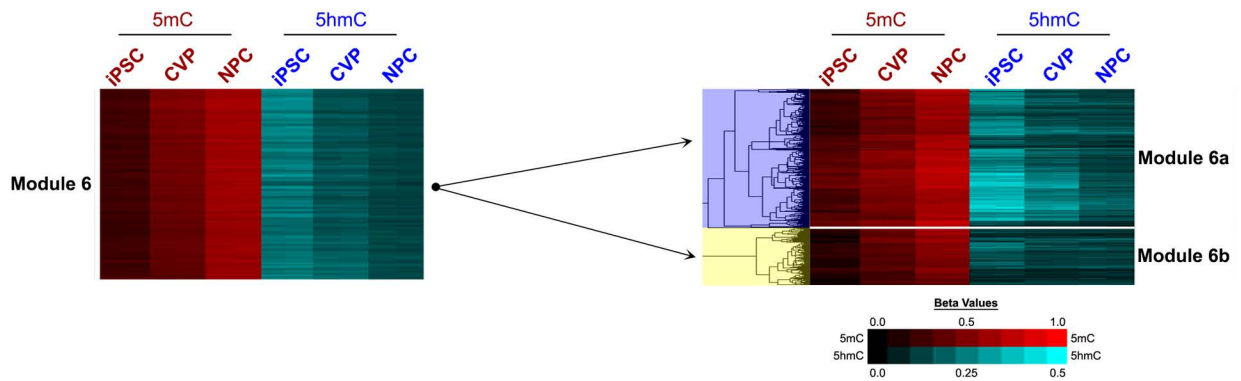

Figure S4

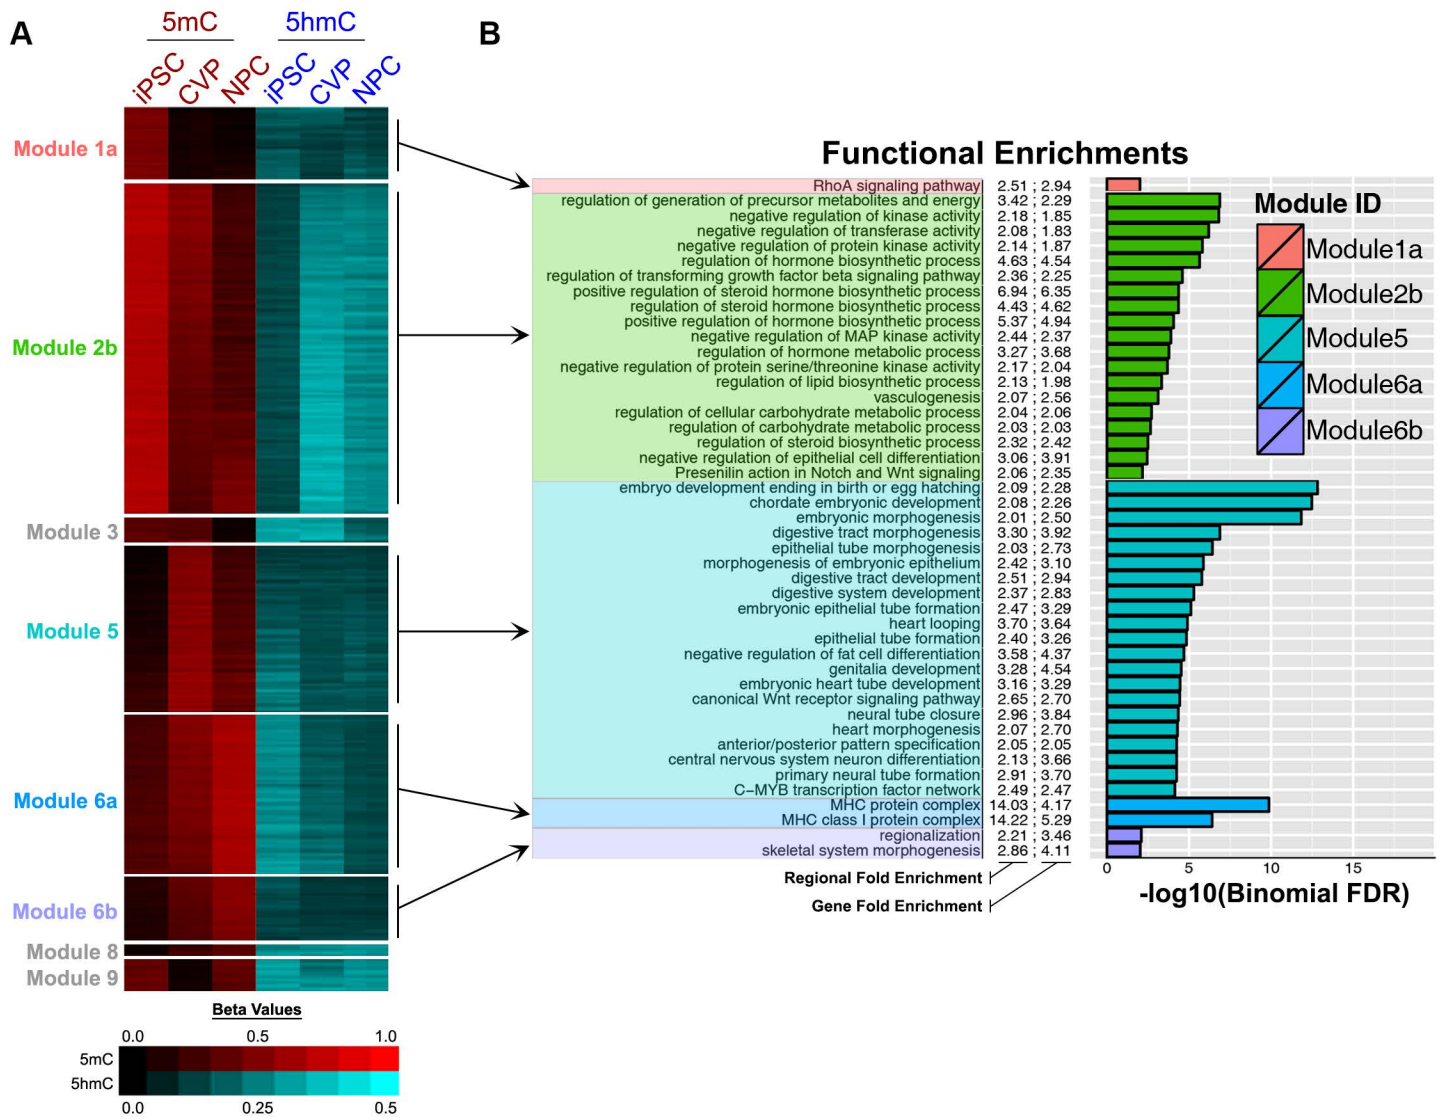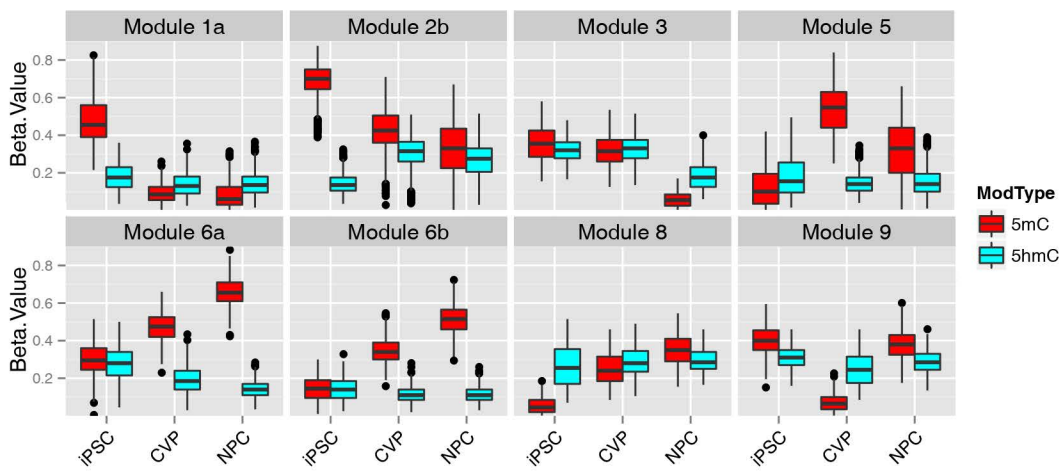

Supplement: NIHMS664956-supplement-1.pdf [file NIHMS664956-supplement-1.pdf]
